# Supplementary material
Source: publisher figshare collection journal article supplement (https://frontiersin.figshare.com/ndownloader/files/34598561)
Supplement: Supplementary file [file 34598561]

# RNA seq based transcriptomics study to investigate the genes governing nitrogen use efficiency in Indian wheat cultivars

**Sarabjit Kaur<sup>1†</sup>, M. Shamshad<sup>2†</sup>, Suruchi Jindal<sup>1</sup>, Amandeep Kaur<sup>1</sup>, Satinder Singh<sup>2</sup>, Achla sharma<sup>2\*</sup> and Satinder Kaur<sup>1\*</sup>**

1. School of Agricultural Biotechnology, Punjab Agricultural University, Ludhiana, India

2. Department of Plant Breeding and Genetics, Punjab Agricultural University, Ludhiana, India

†Sarabjit Kaur, M. Shamshad contributed equally to this work.

\*Corresponding author email: [satinder.biotech@pau.edu](mailto:satinder.biotech@pau.edu), [achla@pau.edu](mailto:achla@pau.edu)

[SK: 0000-0003-0672-9268](tel:0000-0003-0672-9268)

[AK: 0000-0002-9140-3424](tel:0000-0002-9140-3424)

[SK: 0000-0003-3704-3074](tel:0000-0003-3704-3074)

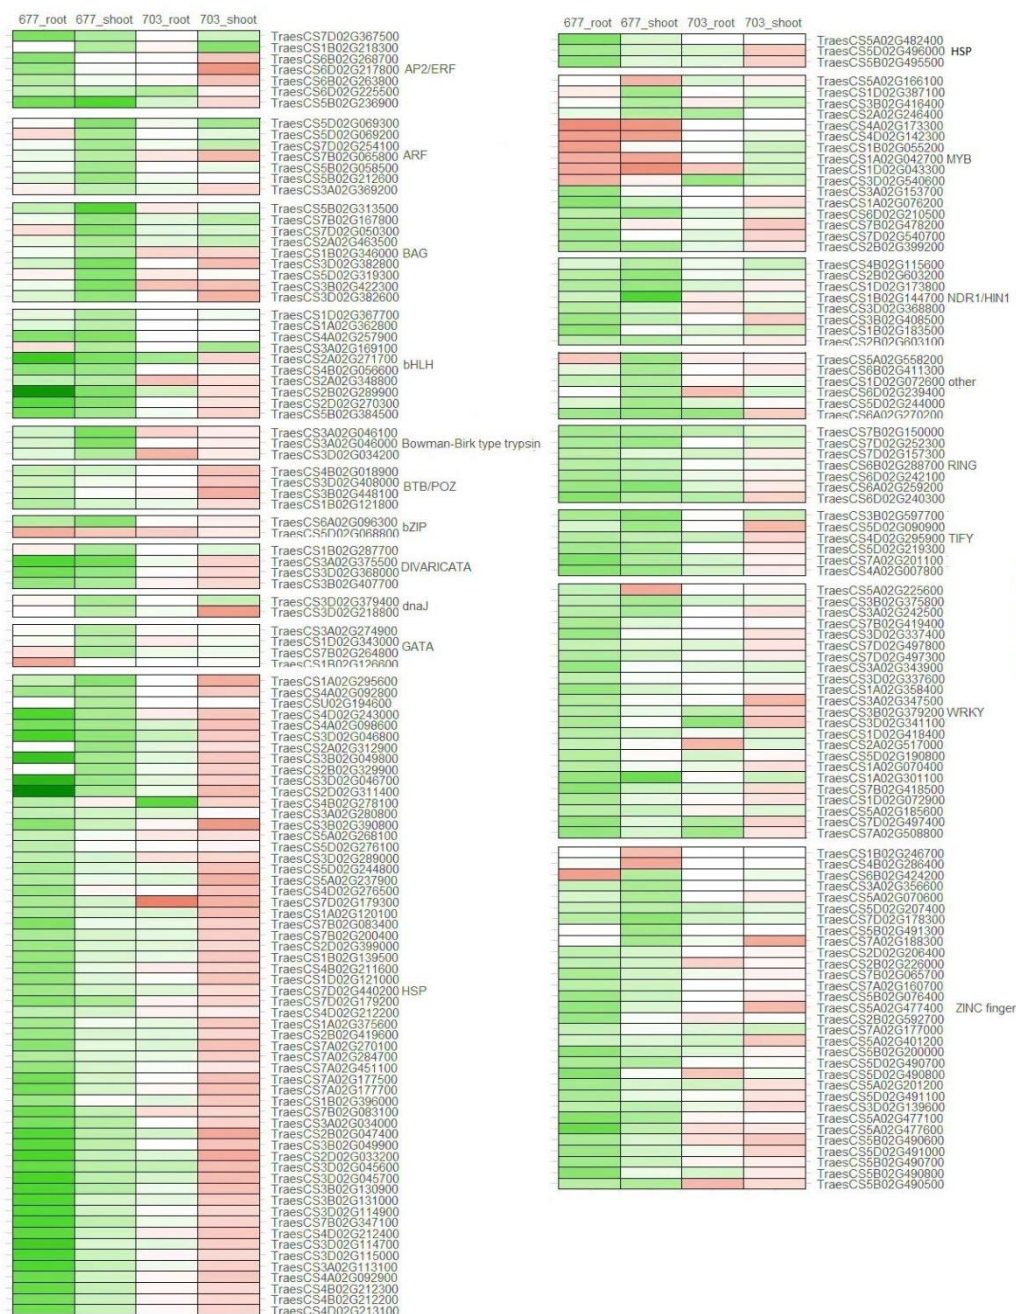

**Supplementary Figure 1.** Heatmap showing the expression patterns of genes involved as transcription factors response in between tissues and also in both genotypes.

\* Colours indicate the differential gene expression in nitrogen stressed tissue; upregulated, green, downregulated, red, white: not differentially expressed.

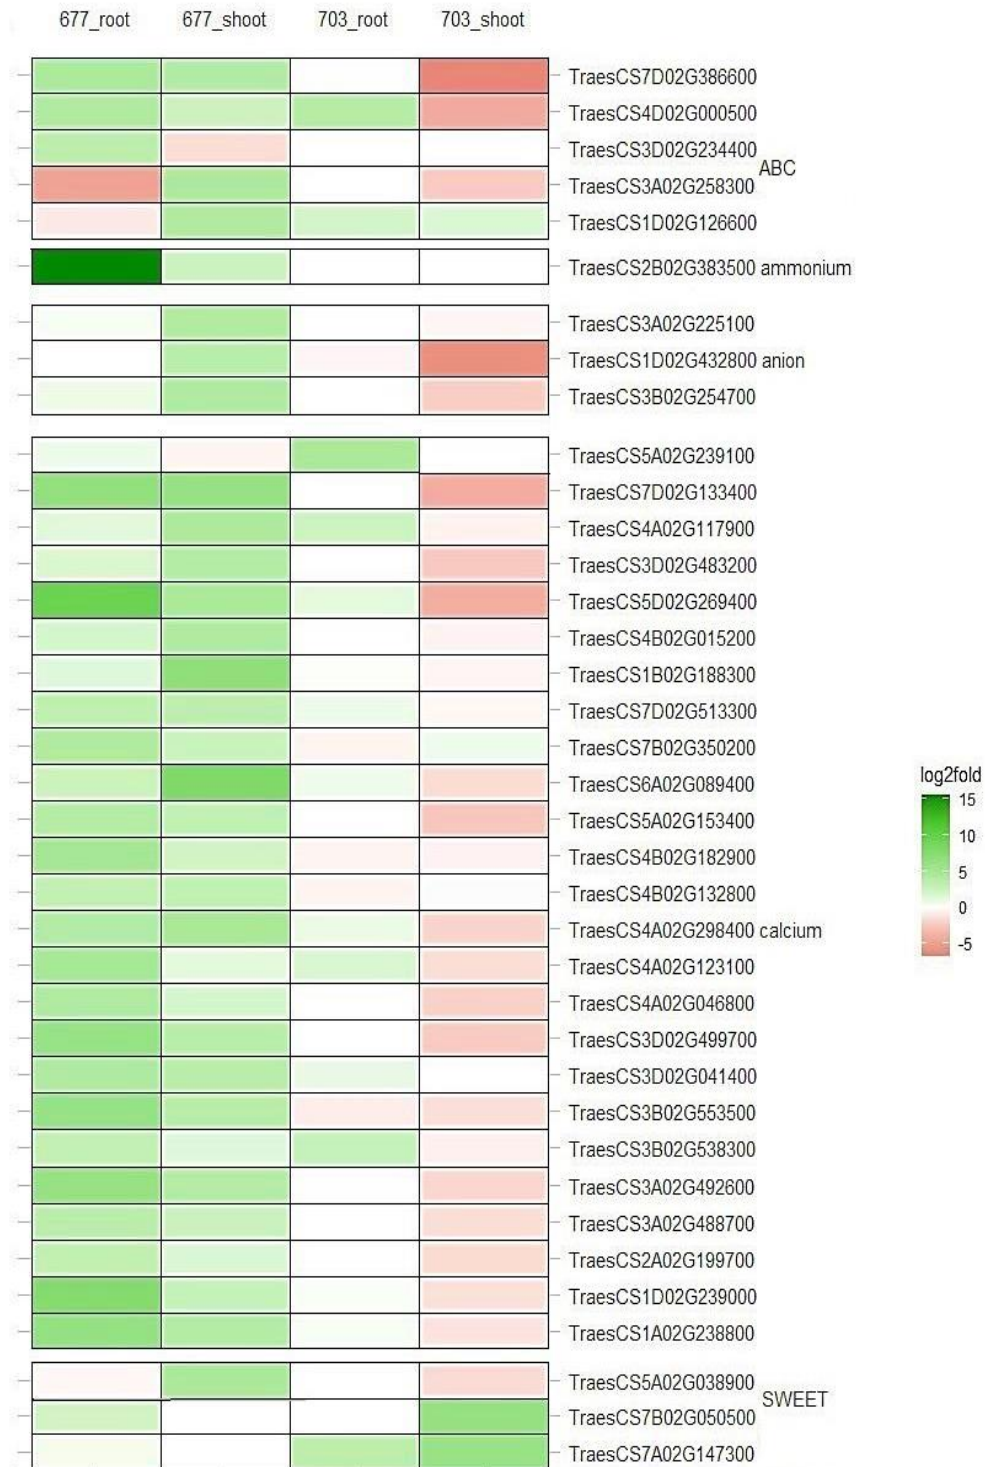

**Supplementary Figure 2.** Heatmap showing the expression patterns of genes involved as transporter in between tissues and also in both genotypes.

\* Colours indicate the differential gene expression in nitrogen stressed tissue; upregulated, green, downregulated, red, white: not differentially expressed.

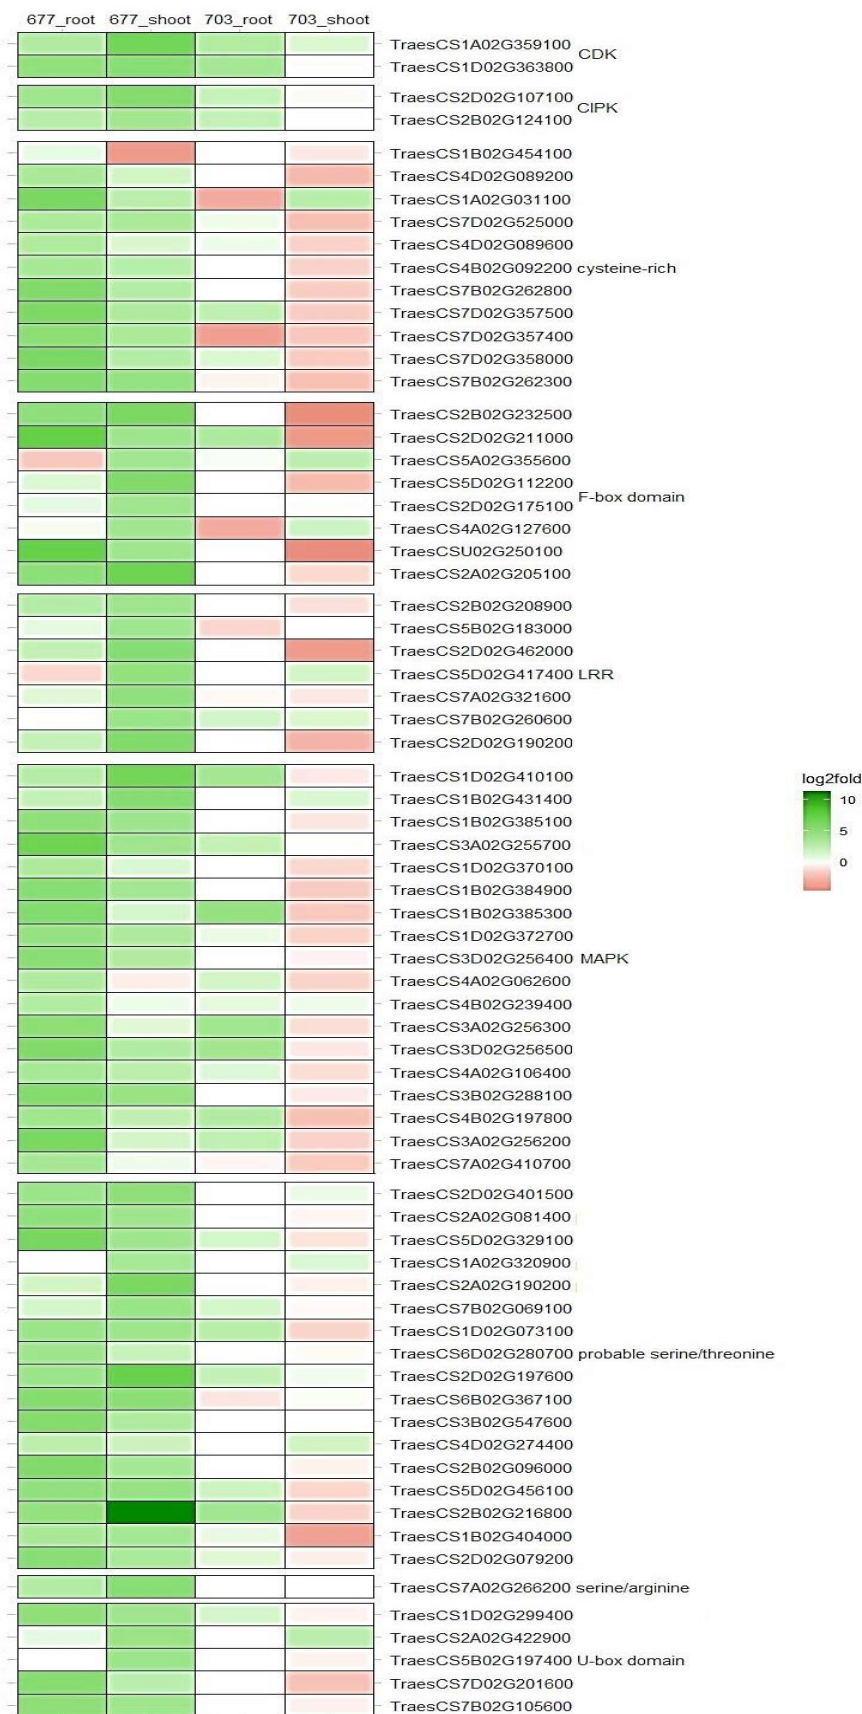

**Supplementary Figure 3.** Heatmap showing the expression patterns of genes involved as protein kinases in between tissues and also in both genotypes.

\* Colours indicate the differential gene expression in nitrogen stressed tissue; upregulated, green, downregulated, red, white: not differentially expressed.



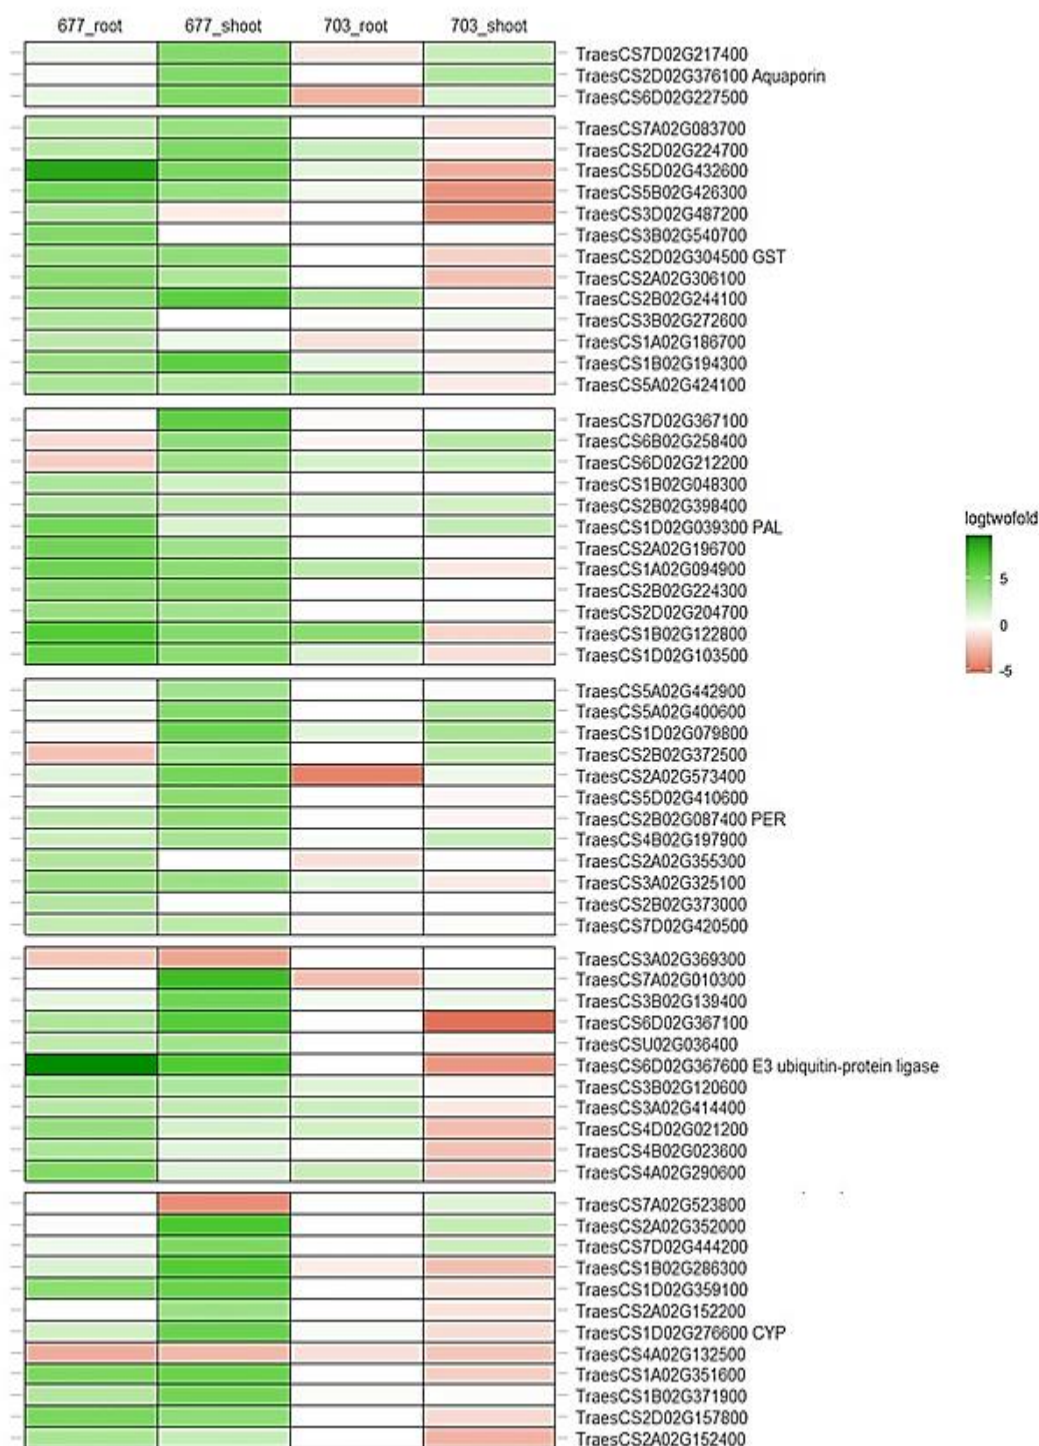

**Supplementary Figure 4.** Heatmap showing the expression patterns of other genes in between tissues and also in both genotypes

\* Colours indicate the differential gene expression in nitrogen stressed tissue; upregulated, green, downregulated, red, white: not differentially expressed.
